1 ***Medicago truncatula* Yellow Stripe1-Like3 gene is involved in symbiotic nitrogen fixation**

2 Rosario Castro-Rodríguez<sup>1,#</sup>, Isidro Abreu<sup>1</sup>, María Reguera<sup>1</sup>, Lorena Novoa-Aponte<sup>2</sup>, Ana  
3 Mijovilovich<sup>3</sup>, Francisco J. Jiménez-Pastor<sup>4</sup>, Javier Abadía<sup>4</sup>, Jiangqi Wen<sup>5</sup>, Kirankumar S.  
4 Mysore<sup>5</sup>, Ana Álvarez-Fernández<sup>4</sup>, Hendrik Küpper<sup>3,6</sup>, Juan Imperial<sup>7</sup>, Manuel González-  
5 Guerrero<sup>1,8\*</sup>

6 <sup>1</sup>Centro de Biotecnología y Genómica de Plantas (UPM-INIA). Universidad Politécnica de  
7 Madrid. Campus de Montegancedo. Crta. M-40 km 38. 28223 Pozuelo de Alarcón (Madrid),  
8 Spain.

9 <sup>2</sup>Department of Chemistry and Biochemistry. Worcester Polytechnic Institute. 100 Institute  
10 Road. Worcester, MA01609. USA.

11 <sup>3</sup> Czech Academy of Sciences, Biology Centre, Institute of Plant Molecular Biology,  
12 Department of Plant Biophysics and Biochemistry. CZ-37005 České Budějovice. Czech  
13 Republic.

14 <sup>4</sup> Estación Experimental de Aula Dei, Consejo Superior de Investigaciones Científicas, 50059  
15 Zaragoza, Spain.

16 <sup>5</sup>Noble Research Institute. Ardmore OK73401. USA

17 <sup>6</sup> University of South Bohemia, Department of Experimental Plant Biology, Branišovská  
18 31/1160, 370 05 České Budějovice, Czech Republic.

19 <sup>7</sup>Instituto de Ciencias Agrarias, Consejo Superior de Investigaciones Científicas. Serrano,  
20 115 bis, 28006 Madrid. Spain.

21 <sup>8</sup>Escuela Técnica Superior de Ingeniería Agronómica, Alimentaria y de Biosistemas,  
22 Universidad Politécnica de Madrid, 28040 Madrid, Spain.

23 <sup>#</sup>Current address: Department of Biology. University of Massachusetts. Amherst MA01003.  
24 USA

25 **\*Corresponding author:** M. González-Guerrero, Centro de Biotecnología y Genómica de  
26 Plantas (UPM-INIA), Crta M-40 km39, 28223 Pozuelo de Alarcón (Madrid), Spain. Tel: +34  
27 91 067 9190. Email: [manuel.gonzalez@upm.es](mailto:manuel.gonzalez@upm.es)

28

29 **Highlight**

30 *Medicago truncatula* YSL3 transporter is required for optimal nitrogen fixation in root  
31 nodules, mediating iron and zinc distribution in these organs.

32

33

34

35

36

37

38

39

40

41

42

43

44

45

46

47

48

49

50

51

52

53

54 **Abstract**

55 Symbiotic nitrogen fixation carried out in legume root nodules requires transition  
56 metals. These nutrients are delivered by the host plant to the endosymbiotic nitrogen-fixing  
57 bacteria living with the nodule cells, a process in which vascular transport is essential. As  
58 occurs in root-to-shoot transport, members of the Yellow Stripe-Like (YSL) family of metal  
59 transporters should also be required for root-to-nodule metal delivery. The genome of the  
60 model legume *Medicago truncatula* encodes for eight YSL proteins, four of them with a high  
61 degree of similarity to *Arabidopsis thaliana* YSLs involved in long-distance metal  
62 trafficking. Among them, MtYSL3 is a plasma membrane protein expressed by vascular cells  
63 in roots and nodules, and by cortical nodule cells. Reducing expression levels of this gene  
64 had no major effect on plant physiology when assimilable nitrogen was provided in the  
65 nutrient solution. However, nodule functioning was severely impaired, with a significant  
66 reduction of nitrogen fixation capabilities. Further, iron and zinc accumulation and  
67 distribution changed. Iron was retained in the apical region of the nodule, while zinc became  
68 strongly accumulated in the nodule veins in the *ysl3* mutant. These data suggest a role of  
69 MtYSL3 in vascular delivery of iron and zinc to symbiotic nitrogen fixation.

70

71 **Keywords:** Iron, Medicago, micro X-ray fluorescence ( $\mu$ XRF), nitrogenase, symbiotic  
72 nitrogen fixation, transition metal transport.

73

74

75

76

77

78

79

80

81

## 82 **Introduction**

83 Iron, copper, and other transition metals are required at relatively high levels for  
84 biological nitrogen fixation, the conversion of N<sub>2</sub> into NH<sub>4</sub><sup>+</sup> carried out by diazotrophic  
85 microorganisms (González-Guerrero *et al.*, 2014; González-Guerrero *et al.*, 2016). These  
86 elements act as cofactors of key enzymes mediating the process, such as nitrogenases that  
87 directly catalyse the reaction, cytochrome oxidases that provide energy to the reaction and  
88 control O<sub>2</sub> levels, or many of the free radical detoxification enzymes (Appleby, 1984; Rubio  
89 *et al.*, 2004; Rubio and Ludden, 2005). Therefore, ensuring proper transition metal uptake is  
90 critical for any diazotrophic organism. Free-living nitrogen-fixing bacteria use a large battery  
91 of siderophores, transition metal transporters, and storage proteins to directly acquire them  
92 from the environment (Jurkevitch *et al.*, 1992; Yeoman *et al.*, 2000; Navarro-Rodríguez *et*  
93 *al.*, 2019). In contrast, symbiotic diazotrophs must obtain the required metal nutrients through  
94 their host (González-Guerrero *et al.*, 2016).

95 The paradigmatic example of a symbiotic diazotroph are the bacteria known as  
96 rhizobia. These organisms colonize the cells of legume root nodules, organs developed to  
97 provide the conditions for nitrogen fixation to occur (Downie, 2014). Within the nodule cells,  
98 rhizobia are surrounded by plant-derived membranes, the symbiosome membranes, and  
99 differentiate into the nitrogen-fixing form, the bacteroids (Kereszt *et al.*, 2011). Across the  
100 symbiosome membrane, bacteroids deliver the fixed nitrogen while receive photosynthates,  
101 phosphate, sulfur, as well as the essential transition elements needed for nitrogen fixation  
102 (Udvardi and Poole, 2013). Transition metal nutrients are delivered from the plant root to the  
103 nodule through the vasculature and released in the apoplast of the area of bacteroid  
104 differentiation (Rodríguez-Haas *et al.*, 2013), in a process that resembles metal delivery to  
105 shoots (Conte and Walker, 2011). There, different metal transporters introduce these  
106 nutrients into the nodule cell cytosol and transfer them across the symbiosome membranes.  
107 Several of them have been identified, particularly those proteins located at the host cell  
108 plasma membrane and at the symbiosome membrane (Tejada-Jiménez *et al.*, 2015; Abreu *et*  
109 *al.*, 2017; Tejada-Jiménez *et al.*, 2017; Senovilla *et al.*, 2018; Escudero *et al.*, 2019a).  
110 However, it largely remains to be determined how vascular transport occurs and which  
111 proteins are mediating it.

112 Transition metal loading in the root vasculature is mediated by transporters of the  
113 ferroportin and P<sub>1b</sub>-ATPase families (Hussain *et al.*, 2004; Andrés-Colás *et al.*, 2006;  
114 Morrissey *et al.*, 2009). Once in the saps, metals are chelated by a collection of soluble  
115 molecules, with a prominent role of citrate and nicotianamine (NA). These molecules  
116 facilitate metal solubility and prevent oxidative damage (Flis *et al.*, 2016). When metals reach  
117 the shoots, they are recovered from the sap as metal-NA complexes and introduced into the  
118 cells by members of the Yellow Stripe-Like (YSL) family (Curie *et al.*, 2008). These are a  
119 family of plant-specific proteins participating in remobilization of intracellular metal  
120 reserves, mediating long-distance metal trafficking and signalling, and in metal uptake from  
121 soil by grasses (Curie *et al.*, 2001; Waters *et al.*, 2006; Conte *et al.*, 2013; Kumar *et al.*, 2017).  
122 In *Arabidopsis thaliana*, AtYSL1 and AtYSL3 are responsible for iron delivery to shoots as  
123 well as for signalling iron sufficiency (Waters *et al.*, 2006; Kumar *et al.*, 2017). Considering  
124 the high metal demand of nitrogen fixation (O'Hara, 2001), a large portion of these nutrients  
125 has to be delivered to nodules, where similar mechanisms to those reported in shoots would  
126 likely be in place. Therefore, it should be expected that metal-NA transporting YSLs similar  
127 to AtYSL1 or AtYSL3 are functional in the nodule vasculature. Recent identification of  
128 nodule nicotianamine synthases and evidence on their importance for iron homeostasis in  
129 nodules supports this hypothesis (Avenhaus *et al.*, 2016; Escudero *et al.*, 2019b).

130 Here we report the role of *Medtr3g092090*, MtYSL3, a *Medicago truncatula*  
131 orthologue of AtYSL3, highly expressed in nodules and with a vascular localization.  
132 Mutation of *MtYSL3* results in a reduction of nitrogenase activity that affects plant growth,  
133 the likely consequence of reduced iron and zinc content in nodules and its altered distribution.  
134 The data is consistent with a role of MtYSL3 in iron and zinc delivery to nodules.

135

## 136 **Materials and Methods**

### 137 **Biological Materials and plant growth conditions**

138 *Medicago truncatula* seeds were scarified and surface sterilized following the same  
139 protocol described in Tejada-Jiménez *et al.* (2015). After a previous pre-germination step in  
140 water agar 0.8% plates during 48h at 22°C, seedlings were planted in sterilized perlite pots  
141 and inoculated with *Sinorhizobium meliloti* 2011 or *S. meliloti* 2011 transformed with pHC60

142 (GFP expressing vector) (Cheng and Walker, 1998) for nodulation assays. Nodules were  
143 collected 28 dpi. For non-symbiotic experiments, plants were watered every 2 weeks with  
144 solutions supplemented with 2 mM NH<sub>4</sub>NO<sub>3</sub>. In all cases, plants were watered every two  
145 days alternating Jenner's solution with water (Brito *et al.*, 1994) and they were grown in a  
146 greenhouse under 16 h light / 8 h dark at 25 °C / 20 °C conditions. For hairy-roots  
147 transformations, *M. truncatula* seedlings were transformed with *Agrobacterium rhizogenes*  
148 ARqual carrying the appropriate binary vector, as previously described (Boisson-Dernier *et al.*,  
149 2001). Transient expression in *Nicotiana benthamiana* were performed by transforming  
150 leaves with the plasmid constructs in *Agrobacterium tumefaciens* C58C1 (Deblaere *et al.*,  
151 1985). These plants were grown in the greenhouse under the same conditions as *M.*  
152 *truncatula*.

153

#### 154 **RNA isolation and quantitative real-time PCR**

155 RNA was extracted from shoots, roots and nodules using Tri-Reagent (Life  
156 Technologies), DNase treated and cleaned with RNeasy Minikit (Qiagen, Valencia, CA).  
157 One microgram of DNA-free RNA was used to synthesize cDNA by using PrimeScript™ RT  
158 Reagent Kit (TAKARA, Kusatsu, Shiga, Japan).

159 Gene expression was studied by quantitative real-time PCR (StepOne plus, Applied  
160 Biosystems) using the Power SyBR Green master mix (Applied Biosystems). Primers used  
161 are listed in Table S1. RNA levels were normalized by using the *ubiquitin carboxy-terminal*  
162 *hydrolase* gene as internal standard for *M. truncatula* genes (Kakar *et al.*, 2008).

163

#### 164 **β-glucuronidase (GUS) assay**

165 A transcriptional fusion between *MtYSL3* promoter and the β-glucuronidase gene was  
166 constructed by amplifying two kilobases upstream of *MtYSL3* start codon using primers  
167 indicated on Table S1. This amplicon was inserted into pDONR207 and transferred to  
168 pGWB3 (Nakagawa *et al.*, 2007) using Gateway technology® (Invitrogen). *M. truncatula*  
169 R108 roots were transformed as indicated above. Transformed plants were transferred to  
170 sterilized perlite pots and inoculated with *S. meliloti* 2011. GUS activity was determined in

171 28 dpi plants as described (Vernoud *et al.*, 1999).

172

### 173 **Immunolocalization of MtYSL3-HA**

174 The genomic full sequence of *MtYSL3* including two kilobases upstream of its start  
175 codon was amplified using the primers indicated in Suppl. Table 1 and fused with three C-  
176 terminal HA epitopes in frame by cloning into the pGWB13 (Nakagawa *et al.*, 2007). Hairy-  
177 root transformation was performed as described previously by Boisson-Dernier *et al.* (2001).  
178 Transformed plants were inoculated with *S. meliloti* 2011 containing the pHc60 plasmid that  
179 constitutively expresses GFP. After 28 dpi, nodules and roots were collected. Fixation and  
180 immunohistochemistry protocols were carried out as indicated by Tejada-Jiménez *et al.*  
181 (2015).

182

### 183 **Transient expression in *N. benthamiana* leaves**

184 *MtYSL3* coding sequence was cloned into pGWB6 (Nakagawa *et al.*, 2007) using  
185 Gateway Technology (Invitrogen) resulting in a N-terminal fusion with GFP. This construct,  
186 and the plasma membrane marker pBIN *AtPIP2*-CFP (Nelson *et al.*, 2007) were introduced  
187 into *A. tumefaciens* C58C1 (Deblaere *et al.*, 1985). Transformants were grown in a liquid  
188 medium to late exponential phase, centrifuged and resuspended to an OD<sub>600</sub> of 1.0 in 10 mM  
189 MES pH 5.6, containing 10 mM MgCl<sub>2</sub> and 150 µM acetosyringone. These cells were mixed  
190 with an equal volume of *A. tumefaciens* C58C1 expressing the silencing suppressor p19 of  
191 Tomato bushy stunt virus (pCH32 35S:p19) (Wood *et al.*, 2009). Bacterial suspensions were  
192 incubated for 3 h at room temperature and then injected into young leaves of 4 weeks-old *N.*  
193 *benthamiana* plants. Expression of the appropriate construct was analysed after 3 days by  
194 confocal laser-scanning microscopy (Leica SP8) with excitation lights of 405 nm for CFP  
195 and 488 nm for GFP.

196

### 197 **Nitrogenase activity**

198 The acetylene reduction assay was used to measure the nitrogenase activity (Hardy *et*  
199 *al.*, 1968). Wild-type and mutant roots at 28 dpi were introduced separately in 30 ml tubes

200 fitted with rubber stoppers. Each tube contained from three to five roots. Three milliliters of  
201 air in each tube was replaced by the same volume of acetylene and subsequently, they were  
202 incubated for 30 min at room temperature. Gas samples (0.5 ml) were analyzed in a Shimadzu  
203 GC-8A gas chromatograph fitted with a Porapak N column. The amount of ethylene produced  
204 was determined by measuring the height of the ethylene peak relative to background. Each  
205 point consists of two tubes each measured in triplicate. After measurements, nodules were  
206 recovered from roots to measure their weight.

207

### 208 **Metal content measurements**

209 Iron, copper and zinc content were determined in shoots, roots, and nodules 28 dpi.  
210 Plant tissues were weighted and mineralized in 15.6 M HNO<sub>3</sub> (trace metal grade) for 1 h at  
211 80 °C and overnight at 20 °C. Digestions were completed with 2 M H<sub>2</sub>O<sub>2</sub>. Samples were  
212 diluted in 300 mM HNO<sub>3</sub> prior to measurements. Element analyses were performed with  
213 Atomic Absorption Spectroscopy (AAS) in an AAnalyst 800 (Perkin Elmer), equipped with  
214 a graphite furnace. All samples were measured in duplicate.

215

### 216 **Metal localization by micro-X-ray fluorescence (μ-XRF)**

217 A customised benchtop μXRF beamline “M4 Tornado” (Bruker Nano GmbH,  
218 Germany) as described in detail by Mijovilovich *et al.* (2020), was used for analysing tissue-  
219 level metal distribution in the root nodules. In brief, in this machine the nodules were kept  
220 alive in a custom-designed measuring chamber where throughout the measurement they were  
221 kept in Jenner’s solution. The measurement was done by excitation with a Rh tube with fibre  
222 optic focusing of the beam to 15 μm and filtering of the excitation spectrum with an AlTi  
223 filter. A step size of 8 μm was applied to yield a 2x oversampling. The measured μXRF  
224 spectra in each pixel of the μXRF maps were deconvoluted using the software supplied with  
225 the Tornado. The net counts in the resulting element distribution maps were recalculated to  
226 mM concentrations according to a certified liquid standard (standard solution VI, Merck  
227 KGaA Darmstadt Germany) in a cuvette of the thickness of an average nodule. Colour scales  
228 were assigned to the quantified data using ImageJ, after which they were converted from



229 16bit to RGB format for assembling the figure using PhotoImpact X3 (Corel Corporation,  
230 Ottawa, Canada).

231

### 232 **NA content determination**

233 Nicotianamine was extracted as previously described (Banakar *et al.*, 2017) with  
234 some modifications. Briefly, nicotianamine was extracted from approximately 50 mg of  
235 nodules, and frozen grinded in 400  $\mu$ l miliQ water spiked with nicotyl-lysine (150  $\mu$ M final  
236 concentration) as internal standard. Samples were homogenized in a mixer mill (Retsch  
237 MM300, Retsch) during 5 min at 30 sec<sup>-1</sup> frequency, and then centrifuged at 12000 g for 10  
238 minutes at 4 °C. Supernatant was then passed through a 3 kDa cutoff centrifugal filter  
239 (cellulose Amicon® , Merck) (1 h at 14000 g at 4 °C) and dried under vacuum (1.5 h at 40  
240 °C). Dry residues from shoots were dissolved in 20  $\mu$ l of miliQ water, whereas root-and-  
241 nodule dry residues were dissolved in 15  $\mu$ l. Then 5  $\mu$ l aliquots were mixed with EDTA (final  
242 concentration 8.33 mM) to dissociate potential nicotianamine-metal complexes, and 50 %  
243 (v/v) mobile phase A (see below) to favor chromatographic separation. The mixture was  
244 filtered through 0.45 polyvinylidene fluoride (PVDF) ultrafree-MC centrifugal filter devices  
245 (Merck) before analysis.

246 Nicotianamine levels were determined by high-performance liquid chromatography  
247 electrospray ionization time-of-flight mass spectrometry (HPLC-ESI-TOF-MS) as described  
248 by Banakar et al. (2017). The samples were fractionated using an Alliance 2795 HPLC  
249 system (Waters) and  $\mu$ LC column (SeQuant ZIC®-HILIC, 15 cm x 1 mm internal diameter,  
250 5  $\mu$ m, 200 Å, Merck), with a mobile phase consisting of solvent A (10 % 10 mM ammonium  
251 acetate pH 7.3 90 % acetonitrile) and solvent B (80 % 30 mM ammonium acetate pH 7.3 20  
252 % acetonitrile) at a flow rate of 0.15 ml min<sup>-1</sup>. The gradient program started at 100 % (v/v)  
253 solvent A for 3 min, and then decreased linearly to 30 % (v/v) solvent A over the next 7 min,  
254 then remained for 7 min at 30 % (v/v) solvent A, and then returned to the initial conditions  
255 over the next 8 min. The column was then allowed to stabilize for 10 min at the initial  
256 conditions before proceeding to the next injection. The total HPLC run time was 35 min, the  
257 injection volume was 10  $\mu$ l and the auto sampler and column temperatures were 6 °C and 30  
258 °C, respectively. The HPLC was coupled to the MicrOTOF mass spectrometer (Bruker  
259 Daltonics) equipped with an ESI source. The operating conditions were optimized by the

260 direct injection of 100  $\mu$ M solutions of nicotianamine standard at a flow rate of 180  $\mu$ l h<sup>-1</sup>.  
261 Mass spectra were acquired in negative ion mode over the 150–700 mass-to-charge ( $m/z$ )  
262 ratio range. The mass axis was calibrated externally using Li–formate adducts (10 mM LiOH,  
263 0.2 % (v/v) formic acid and 50% (v/v) 2-propanol). Bruker Daltonik software packages  
264 micrOTOF Control v2.2, HyStar v3.2 and Data Analysis v4.0 were used to control the MS,  
265 HPLC interface and for data processing, respectively. Nicotianamine (Toronto Research  
266 Chemicals) calibration curve were prepared with nycotyl-lysine as internal standard.

267

## 268 **Bioinformatics**

269 To identify *M. truncatula* YSL family members, BLASTN and BLASTX searches  
270 were carried out in the *M. truncatula* Genome Project site  
271 (<http://www.jcvi.org/medicago/index.php>). Protein sequences for tree construction were  
272 obtained from Phytozome (<https://phytozome.jgi.doe.gov/pz/portal.html>), Uniprot  
273 (<http://www.uniprot.org/blast/>) and from NCBI  
274 (<https://blast.ncbi.nlm.nih.gov/Blast.cgi?PAGE=Proteins>): *Medicago truncatula* MtYSL1  
275 (Medtr1g077840); MtYSL2 (Medtr1g007540); MtYSL3 (Medtr3g092090); MtYSL4  
276 (Medtr1g007580); *Arabidopsis thaliana* AtYSL1 (At4g24120), AtYSL2 (At5g24380),  
277 AtYSL3 (At5g53550), *Oryza sativa* OsYSL15 (Os02g0650300), OsYSL16  
278 (Os04g0542800); *Zea mays* ZmYS1 (Zm00001d017429), ZmYSL2 (Zm00001d025977),  
279 *Brachypodium distachyon* BdYS1A (BRADI\_3g50267), BdYS1B (BRADI\_3g50263),  
280 BdYSL2 (BRADI\_3g50260), BdYSL3 (BRADI\_5g17230).

281 Trees were constructed from a ClustalW multiple alignment of the sequences  
282 (<http://www.ebi.ac.uk/Tools/msa/clustalw2>), then analyzed by MEGA7 (Kumar *et al.*, 2016)  
283 using a Neighbour-Joining algorithm with bootstrapping (1,000 iterations). Unrooted trees  
284 were visualized with FigTree (<http://tree.bio.ed.ac.uk/software/figtree>).

285 The topology modelling were performed using the visualization software PROTTER  
286 (<http://wlab.ethz.ch/protter/start/>), which includes the transmembrane region prediction  
287 software Phobius.

288

## 289 **Statistical tests**

290 Data were analyzed with Student's unpaired t test to calculate statistical significance of  
291 observed differences. Test results with p-values lower than 0.05 were considered as  
292 statistically significant.

293

## 294 **Results**

### 295 ***MtYSL3* is highly expressed in the nodule vasculature**

296 The proteins of the YSL family cluster in four groups, with group I being the best  
297 characterized (Yordem *et al.*, 2011). It includes AtYSL1, 2 and 3, founding protein *Zea mays*  
298 YS1, and four *M. truncatula* YSLs (*MtYSL1-4*, *Medtr1g077840*, *Medtr1g007540*,  
299 *Medtr3g092090*, *Medtr1g007580*, respectively) (Fig. 1A). Among the *M. truncatula* group I  
300 YSLs, expression of *MtYSL4* was not detected in any of the organs tested (Fig. S1), while the  
301 other three were expressed in shoots and roots from inoculated and non-inoculated plants, as  
302 well as in nodules. (Fig. 1B, Fig. S1). *MtYSL1* transcripts were more abundant in shoots than  
303 anywhere else in the plants. *MtYSL2* and *MtYSL3* transcription was more intense in nodules,  
304 being the latter the most highly expressed, approximately four times higher in nodules than  
305 in any other plant organ. The inoculation with *S. meliloti* did not result in significant  
306 transcriptional changes in shoots or roots compared to non-inoculated nitrogen-fertilized  
307 plants.

308 To locate the tissue expression of *MtYSL3*, the 2 kb region upstream of *MtYSL3* was  
309 used to drive the expression of the  $\beta$ -glucuronidase (*gus*) gene. After 28 days post-inoculation  
310 (dpi), roots and nodules were incubated with X-gluc to visualize the GUS activity. The  
311 staining pattern was consistent with a vascular expression of *MtYSL3* in both organs (Fig.  
312 1C). Longitudinal sections of those nodules revealed a peripheral distribution of the signal,  
313 associated to the vasculature, and no expression in the inner nodule region (Fig. 1D). This  
314 was also supported by nodule cross-section images (Fig. 1E). In addition, some GUS activity  
315 was observed in these sections in cortical nodule cells, although at much lower intensity than  
316 in the vasculature. In roots, *MtYSL3* expression was confined to the endodermis and inner  
317 vascular layers (Fig. 1F).

318 Immunolocalization of epitope-tagged MtYSL3 supports the GUS activity assays.  
319 Three hemagglutinin (HA) tags were fused to the C-terminus of the protein and expressed  
320 under its own promoter region. MtYSL3-HA localization was visualized using a primary  
321 anti-HA mouse antibody and an Alexa594-conjugated anti-mouse antibody. The transformed  
322 plants were inoculated with a strain of *S. meliloti* that constitutively expresses GFP. The HA  
323 epitope of MtYSL3-HA was detected in the vasculature of the nodule and in cortical cells  
324 (Fig. 2A and B). Closer detail of the vascular region showed colocalization with the  
325 autofluorescence pattern of the Casparian strip, indicating that MtYSL3-HA was located in  
326 the endodermis (Fig. 2C). In roots, MtYSL3-HA was observed in the endodermis and in inner  
327 vascular cells, very likely the xylem parenchyma (Fig. 2D). The peripheral distribution of the  
328 Alexa594 signal was indicative of a plasma membrane distribution. To test this possibility,  
329 *N. benthamiana* leaves were co-agroinfiltrated with a plasmid constitutive expressing  
330 *MtYSL3* fused to GFP and plasma membrane marker AtPIP2 fused to CFP. As shown in Fig.  
331 2E, both the GFP and the CFP signal colocalized. Controls did not show any autofluorescence  
332 in the Alexa594 channel in the conditions tested (Fig. S2).

333

### 334 **MtYSL3 is involved in symbiotic nitrogen fixation**

335 To determine the role of MtYSL3 in *M. truncatula* physiology, two *Tnt1* insertion  
336 lines were obtained from the Noble Research Institute (Tadege *et al.*, 2008). NF17945 (*ysl3-*  
337 *1*) presents an insertion in position +342, within the first exon of the gene (Fig. 3A). NF12068  
338 (*ysl3-2*) is inserted in the promoter region of *MtYSL3*, in position -19. While in both cases  
339 *MtYSL3* expression was detected, these *Tnt1* lines showed a severe reduction of *MtYSL3*  
340 transcript compared to wild type plants (Fig. 3B). Transposon insertion in *ysl3-1* resulted in  
341 an altered splicing that left a 30 nucleotide insertion of the *Tnt1* sequence in *MtYSL3* mRNA.  
342 As result, five amino acids were mutated (Y115D; S116D; I117V; A118H; G120L) and four  
343 more added between amino acid 118 and 119 (LIEE). These changes occurred in a predicted  
344 transmembrane domain, and would likely disrupt this region, as indicated by the  
345 transmembrane region prediction software Phobius (<http://phobius.sbc.su.se/>) (Fig. S3). Loss  
346 of transmembrane domains would cause a major disruption on the functionality of any

347 membrane protein, and thus *ysl3-1* has been considered as a loss-of-function mutant, while  
348 *ysl3-2* would be a knock-down line.

349 Under non-symbiotic conditions, when the plants were not inoculated with rhizobia  
350 but fertilized with ammonium nitrate, no significant differences were observed in plant  
351 growth and biomass production between wild type plants, *Tnt1* segregants with two wild type  
352 copies of *MtYSL3* (+/+ lines), or segregants with both *MtYSL3* copies mutated (-/- lines) (Fig.  
353 3C and D). No significant differences were observed in either total chlorophyll content (Fig.  
354 3E) or iron concentration in shoots either (Fig. 3F). However, *ysl3* plants had a trend to  
355 accumulate more iron in roots, significantly so in the *ysl3-2* allele. Copper levels were not  
356 significantly different in shoots or roots (Fig. 3G), while zinc concentrations were  
357 significantly higher in the roots of both *MtYSL3* mutants (Fig. 3H). Unlike *A. thaliana*  
358 orthologues (Waters *et al.*, 2006), *MtYSL3* mutant plants did not show any significant  
359 reduction in fertility, as indicated by the number of pods per plant and of seeds within them  
360 (Fig. S4).

361 However, when the nitrogen was provided by the endosymbiotic rhizobia within their  
362 root nodules, *ysl3-1* and *ysl3-2* -/- lines had a smaller growth than their wild type segregants  
363 (Fig. 4A). This was also shown when comparing the dry weight of loss-of-function *ysl3-1* -  
364 -/ to the wild type segregant, with significantly lower biomass production (Fig. 4B). While  
365 there were no significant changes in the number of nodules per plant (Fig. 4C), both mutant  
366 lines had approximately 60% of the nitrogenase activity of the wild type control or +/+  
367 segregant lines (Fig. 4D). This could be due to the reduced iron content in nodules of *ysl3-1*  
368 and *ysl3-2* plants (Fig. 4E). While copper concentration did not significantly change in these  
369 organs, *ysl3-2* nodules had less zinc (Fig. 4F and G). However, copper was more  
370 concentrated in *ysl3-1* shoots. Similarly to non-inoculated plants, there was no significant  
371 difference in pod or seed production in these plants compared to their control (Fig. S5).

372

### 373 **MtYSL3 silencing affects iron and zinc distribution**

374 The reduced iron content in *ysl3* nodules and lower nitrogenase activity could be the  
375 result of less iron being delivered to the fixation zone. To test this possibility, we carried out  
376 X-ray fluorescence tests in nodules from wild type and *ysl3-1* nodules (Fig. 5A). While a

377 typical wild type nodule has less iron in the apical region relative to the fixation zone (Fig.  
378 5B), *ysl3-1* nodules had the opposite, indicating that not enough iron would be reaching the  
379 fixation zone. Furthermore, while significant changes in nodule zinc concentration was  
380 observed only in *ysl3-2* nodules, zinc distribution was also affected in *ysl3-1* nodules. X-ray  
381 fluorescence data showed that this nutrient accumulated at much larger levels in the *ysl3-1*  
382 nodule vessels than in wild-type ones (Fig. 5A, C). Although metal-nicotianamine would be  
383 the likely substrate of MtYSL3, no significant differences in nicotianamine content in *ysl3-1*  
384 nodules were observed compared to the wild type (Fig. S6).

385

## 386 Discussion

387 Transition metals are essential plant nutrients (Marschner, 2011). Typically, the main  
388 plant metal sinks are in the leaves, where these elements participate in the electron transport  
389 chains in photosynthesis and oxidative respiration, among several other processes; and in the  
390 seeds, where they are critical for embryo development and germination (Kobayashi and  
391 Nishizawa, 2012; Yruela, 2013; Ibeas *et al.*, 2017). Consequently, plants dedicate a large  
392 effort to ensure metal translocation from roots to leaves and seeds, which includes the  
393 participation of Arabidopsis YSL1 and YSL3 (Curie *et al.*, 2008; Conte *et al.*, 2013).  
394 However, this is more challenging in legumes when they are in symbiosis with rhizobia. Due  
395 to the large amounts of metalloenzymes participating in symbiotic nitrogen fixation (Brear  
396 *et al.*, 2013; González-Guerrero *et al.*, 2014), nodules are a major metal sink. A third of the  
397 total plant iron content and a quarter of the total copper and zinc are concentrated in nodules,  
398 which in the case of *M. truncatula*, represents around 5% of the total plant biomass (Tejada-  
399 Jiménez *et al.*, 2015; Abreu *et al.*, 2017; Senovilla *et al.*, 2018). Therefore, legumes have to  
400 direct large quantities of metals not only to shoots, but also to nitrogen-fixing nodules. In this  
401 task, it is likely that YSL proteins similar to *A. thaliana* YSL1 and YSL3 would participate.

402 MtYSL3 is one of the four clade I YSLs in *M. truncatula*. It is closely related to *A.*  
403 *thaliana* YSL1 and YSL3, both being responsible for long-distance metal delivery (Walker  
404 and Waters, 2011). As it was the case for the *A. thaliana* orthologues, *MtYSL3* is expressed  
405 in the vasculature, both in roots and in nodules. This was confirmed by immunolocalization  
406 of a HA-tagged protein using confocal microscopy. Moreover, MtYSL3-HA had a plasma

407 membrane localization in endodermal and in root xylem parenchyma cells. In nodules, some  
408 expression could also be detected in nodule cortical cells, those in the exterior of the nodule.  
409 This localization would be consistent with a role in vascular transition metal transport, as  
410 well as metal uptake by nodule cortical cells.

411 In non-inoculated plants, MtYSL3 does not seem to play a critical role by itself. There  
412 are no major changes in biomass production, leave chlorosis, or plant fertility. There is a  
413 significant accumulation in roots of zinc in both mutant alleles and of iron in one of them.  
414 But this had no effect on total shoot metal concentrations. This is consistent with the reported  
415 functional redundancy of the YSL family. Likely candidates to complement MtYSL3 would  
416 be MtYSL1 (orthologue to AtYSL1 and expressed primarily in shoots and roots) or MtYSL2  
417 (similar expression profile as *MtYSL3* but at lower levels). In contrast, when *M. truncatula*  
418 is nodulated, mutating or simply silencing *MtYSL3* expression results in a 40% reduction of  
419 nitrogenase activity, with a significant reduction on biomass production when MtYSL3 is  
420 inactivated. Moreover, iron and zinc accumulation and distribution are affected in the  
421 *MtYSL3* mutants. Less iron reaches *ysl3-1* and *ysl3-2* nodules, and it is less abundant in the  
422 fixation zone what would result in less iron being available for nitrogenase cofactor synthesis.  
423 Zinc is retained in the nodule vessels what would result in lower amounts available for nodule  
424 functioning, although the precise role of zinc in nodule functioning is not yet determined.

425 Therefore, it could be proposed that MtYSL3 would be participating in iron and zinc  
426 delivery to nodules, considering that iron levels were reduced in nodules, and zinc became  
427 trapped in the veins of *ysl3*. However, MtYSL3 is likely not the only transporter mediating  
428 this process. Any major disruption of iron, copper, or zinc delivery to nodules results in a  
429 more severe reduction of nitrogenase activity, the presence of white, non-functional nodules,  
430 and/or a reduction in their size (Tejada-Jiménez *et al.*, 2015; Abreu *et al.*, 2017; Tejada-  
431 Jiménez *et al.*, 2017; Kryvoruchko *et al.*, 2018; Senovilla *et al.*, 2018). In contrast, the *ysl3*  
432 phenotype was milder. This would indicate that another, yet-to-be-determined transporter  
433 might be involved in metal delivery from the vasculature. Based on the available  
434 transcriptomic data, it is unlikely that a clade I YSL protein would be carrying out this role  
435 to a larger degree than MtYSL3, considering their lower expression levels in nodules.

436           The localization of MtYSL3 also indicates additional roles to delivering metals to  
437 nitrogen-fixing nodule cells. If this were its unique function, *MtYSL3* would only be  
438 expressed in the vascular region in the infection/differentiation zone of the nodule, since this  
439 is the region where plant-delivered transition metals are released (Rodríguez-Haas *et al.*,  
440 2013). In contrast, as shown for the molybdate vascular transporter MtMOT1.2 (Gil-Díez *et*  
441 *al.*, 2019), MtYSL3 is located along the whole nodule vessels, including the fixation zone.  
442 Moreover, no polar distribution of the transporter was observed, what suggests that mass  
443 effect would drive the net direction of the MtYSL3 substrate, as proposed for MtMOT1.2.  
444 This would be compatible with MtYSL3 being involved in recovering iron and zinc from the  
445 apoplast in Zone III, a role of particular importance when considering the prevalent low metal  
446 bioavailability in soils (Kim and Guerinot, 2007; Alloway, 2008). However, this metal  
447 recovery capability would not be essential either, since none of the *MtYSL3* mutants had any  
448 alteration in fertility, as was reported when both *AtYSL1* and *AtYSL3* were mutated (Waters  
449 *et al.*, 2006). This is in contrast to the proposed role of nicotianamine in metal recycling from  
450 senescent nodules (Hakoyama *et al.*, 2009). All this evidence also indicates the existence of  
451 a redundant protein that would be carrying out this function together with MtYSL3.

452           In addition to the vasculature, MtYSL3 is also located in the cortical nodule cells,  
453 although expressed at lower levels. There, it could be introducing metal-NA complexes  
454 (including iron-NA) into these cells. This is in contrast to rhizobia-infected cells, which  
455 introduce iron as Fe<sup>2+</sup> through a Nramp protein (Tejada-Jiménez *et al.*, 2015), playing citrate  
456 an important role in its solubility in the apoplast (Takanashi *et al.*, 2013; Kryvoruchko *et al.*,  
457 2018). This would indicate the existence of different iron pools to separate a limiting nutrient  
458 with different physiological functions. Previous data on zinc transporter MtZIP6, only  
459 expressed in rhizobia-infected cells, also hints to at least a partial tissue specialization of  
460 metal transport (Abreu *et al.*, 2017). However, work on *in situ* metal speciation analyses  
461 should shed some light into this possibility once synchrotron-based X-ray absorption near-  
462 edge structure reach the required sensitivity and resolution and open the study of the  
463 mechanisms of intertissued metal sorting in nodules.

464           In summary, our data indicates that MtYSL3 is involved in vascular transition metal  
465 delivery, likely iron and zinc, to nitrogen fixing nodule cells, as well as uptake by cortical  
466 cells. Our data also suggests that at least an additional metal transporter is performing



467 analogous functions, since the *ysl3* phenotype is relatively mild. Future work will be directed  
468 towards unveiling these additional transporters.

469

## 470 **Supplementary Data**

471 **Fig. S1. Group I *M. truncatula* YSLs expression.**

472 **Fig. S2. Autofluorescence control for Alexa594 signal.**

473 **Fig. S3. Effect of *ysl3-1 Tnt1* insertion in MtYSL3 topology.**

474 **Fig. S4. Effect of *MtYSL3* mutation in plant fertility under non-symbiotic conditions.**

475 **Fig. S5. Effect of *MtYSL3* mutation in plant fertility under symbiotic conditions.**

476 **Fig. S6. Nicotianamine content in 28 dpi wild type, *ysl3-1*, and *ysl3-2* nodules.**

477 **Table S1. Primers used in this study.**

478

## 479 **Acknowledgements**

480 This research was funded by a European Research Council Starting Grant (ERC-  
481 2013-StG-335284) and a Ministerio de Economía y Competitividad (MINECO) grant  
482 (AGL2015-65866-P), to MGG, and a MINECO grant (AGL2016-75226-R) to JA and AA-  
483 F. RC-R was supported by a Formación del Personal Investigador fellowship (BES-2013-  
484 062674). IA is recipient of a Juan de la Cierva- Formación postdoctoral fellowship from  
485 Ministerio de Ciencia, Innovación y Universidades (FJCI-2017-33222). Development of *M.*  
486 *truncatula Tnt1* mutant population was, in part, funded by the National Science Foundation,  
487 USA (DBI-0703285) to KSM. AM and HK and the  $\mu$ XRF measurements were supported by  
488 the Ministry of Education, Youth and Sports of the Czech Republic with co-financing from  
489 the European Union (grant "KOROLID", CZ.02.1.01/0.0/0.0/15\_003/0000336) and the  
490 Czech Academy of Sciences (RVO: 60077344). We would also like to acknowledge the other  
491 members of laboratory 281 at Centro de Biotecnología y Genómica de Plantas (UPM-INIA)  
492 for their support and feedback in preparing this manuscript.

493

494

495 **References**

496

497 Abreu I, Saez A, Castro-Rodríguez, R, *et al.* 2017. *Medicago truncatula* Zinc-Iron Permease6  
498 provides zinc to rhizobia-infected nodule cells. *Plant Cell & Environment* 40, 2706-2719.

499 Alloway BJ. 2008. Zinc in soils and crop nutrition, 2nd Ed. International Zinc Association  
500 and International Fertilizer Industry Association.

501 Andrés-Colás N, Sancenón V, Rodríguez-Navarro S, Mayo S, Thiele DJ, Ecker JR, Puig S,  
502 Peñarrubia L. 2006. The Arabidopsis heavy metal P-type ATPase HMA5 interacts with  
503 metallochaperones and functions in copper detoxification of roots. *Plant Journal* 45, 225-236.

504 Appleby CA. 1984. Leghemoglobin and *Rhizobium* respiration. *Annual Review of Plant*  
505 *Physiology* 35, 443-478.

506 Avenhaus U, Cabeza RA, Liese R, Lingner A, Dittert K, Salinas-Riester G, Pommerenke C,  
507 Schulze J. 2016. Short-term molecular acclimation processes of legume nodules to increased  
508 external oxygen concentration. *Frontiers in Plant Science* 6, 1012.

509 Banakar R, Alvarez Fernández Á, Abadía J, Capell T, Christou P. 2017. The expression of  
510 heterologous Fe (III) phyto siderophore transporter HvYS1 in rice increases Fe uptake,  
511 translocation and seed loading and excludes heavy metals by selective Fe transport. *Plant*  
512 *Biotechnology Journal* 15, 423-432.

513 Boisson-Dernier A, Chabaud M, Garcia F, Becard G, Rosenberg C, Barker DG. 2001.  
514 *Agrobacterium rhizogenes*-transformed roots of *Medicago truncatula* for the study of  
515 nitrogen-fixing and endomycorrhizal symbiotic associations. *Molecular Plant-Microbe*  
516 *Interactions* 14, 695-700.

517 Brear EM, Day DA, Smith PMC. 2013. Iron: an essential micronutrient for the legume–  
518 rhizobium symbiosis. *Frontiers in Plant Science* 4, 359.

519 Brito B, Palacios JM, Hidalgo E, Imperial J, Ruíz-Argüeso T. 1994. Nickel availability to  
520 pea (*Pisum sativum* L.) plants limits hydrogenase activity of *Rhizobium leguminosarum* bv.  
521 *viciae* bacteroids by affecting the processing of the hydrogenase structural subunits. *Journal*  
522 *of Bacteriology* 176, 5297-5303.

- 523 Cheng HP, Walker GC. 1998. Succinoglycan is required for initiation and elongation of  
524 infection threads during nodulation of alfalfa by *Rhizobium meliloti*. *Journal of Bacteriology*  
525 180, 5183-5191.
- 526 Conte S, Walker EL. 2011. Transporters contributing to iron trafficking in plants. *Molecular*  
527 *Plant* 4, 464-476.
- 528 Conte SS, Chu HH, Rodríguez DC, Punshon T, Vasques KA, Salt DE, Walker EL. 2013.  
529 *Arabidopsis thaliana* Yellow Stripe1-Like4 and Yellow Stripe1-Like6 localize to internal  
530 cellular membranes and are involved in metal ion homeostasis. *Frontiers in Plant Science* 4,  
531 283.
- 532 Curie C, Panaviene Z, Loulergue C, Dellaporta SL, Briat JF, Walker EL. 2001. Maize yellow  
533 stripe1 encodes a membrane protein directly involved in Fe(III) uptake. *Nature* 409, 346-349.
- 534 Curie C, Cassin G, Couch D, Divol F, Higuchi K, Le Jean M, Misson J, Schikora A, Czernic  
535 P, Mari S. 2008. Metal movement within the plant: contribution of nicotianamine and yellow  
536 stripe 1-like transporters. *Annals of Botany* 103, 1-11.
- 537 Deblaere R, Bytebier B, de Greve H, Deboeck F, Schell J, van Montagu M, Leemans J. 1985.  
538 Efficient octopine Ti plasmid-derived vectors for *Agrobacterium*-mediated gene transfer to  
539 plants. *Nucleic Acids Research* 113, 4777-4788.
- 540 Downie JA. 2014. Legume nodulation. *Current Biology* 24, R184-R190.
- 541 Escudero V, Abreu I, Tejada-Jiménez M, *et al.* 2019a. *Medicago truncatula* Ferroportin2  
542 mediates iron import into nodule symbiosomes. bioRxiv:630699. doi: 10.1101/630699.
- 543 Escudero V, Abreu, I, del Sastre E, *et al.* 2019b. Nicotianamine synthase 2 is required for  
544 symbiotic nitrogen fixation in *Medicago truncatula* nodules. bioRxiv:717983.  
545 doi:10.1101/717983.
- 546 Flis P, Ouerdane L, Grillet L, Curie C, Mari S, Lobinski R. 2016. Inventory of metal  
547 complexes circulating in plant fluids: a reliable method based on HPLC coupled with dual  
548 elemental and high-resolution molecular mass spectrometric detection. *New Phytologist* 211,  
549 1129-1141.

- 550 Gil-Díez P, Tejada-Jiménez M, León-Mediavilla J, Wen J, Mysore KS, Imperial J,  
551 González-Guerrero M. 2019. MtMOT1.2 is responsible for molybdate supply to *Medicago*  
552 *truncatula* nodules. *Plant Cell & Environment* 42, 310-320.
- 553 González-Guerrero M, Matthiadis A, Sáez Á, Long TA. 2014. Fixating on metals: new  
554 insights into the role of metals in nodulation and symbiotic nitrogen fixation. *Frontiers in*  
555 *Plant Science* 5, 45.
- 556 González-Guerrero M, Escudero V, Sáez Á, Tejada-Jiménez M. 2016. Transition metal  
557 transport in plants and associated endosymbionts. Arbuscular mycorrhizal fungi and rhizobia.  
558 *Frontiers in Plant Science* 7, 1088.
- 559 Hakoyama T, Watanabe H, Tomita J, Yamamoto A, Sato S, Mori Y, Kouchi H, Suganuma  
560 N. 2009. Nicotianamine synthase specifically expressed in root nodules of *Lotus japonicus*.  
561 *Planta* 230, 309-317.
- 562 Hardy RW, Holsten RD, Jackson EK, Burns RC. 1968. The acetylene-ethylene assay for N<sub>2</sub>  
563 fixation: laboratory and field evaluation. *Plant Physiology* 43, 1185-1207.
- 564 Hussain D, Haydon MJ, Wang Y, Wong E, Sherson SM, Young J, Camakaris J, Harper JF,  
565 Cobbett CS. 2004. P-Type ATPase heavy metal transporters with roles in essential zinc  
566 homeostasis in *Arabidopsis*. *Plant Cell* 16:1327-1339.
- 567 Ibeas MA, Grant-Grant S, Navarro N, Perez MF, Roschttardt H. 2017. Dynamic  
568 subcellular localization of iron during embryo development in Brassicaceae seeds. *Frontiers*  
569 *in Plant Science*. 8, 2186.
- 570 Jurkevitch E, Hadar Y, Chen Y. 1992. Differential siderophore utilization and iron uptake by  
571 soil and rhizosphere bacteria. *Applied and Environmental Microbiology* 58, 119-124.
- 572 Kakar K, Wandrey M, Czechowski T, *et al.* 2008. A community resource for high-throughput  
573 quantitative RT-PCR analysis of transcription factor gene expression in *Medicago*  
574 *truncatula*. *Plant Methods* 4, 18.
- 575 Kereszt A, Mergaert P, Kondorosi E. 2011. Bacteroid development in legume nodules:  
576 Evolution of mutual benefit or of sacrificial victims? *Molecular Plant-Microbe Interactions*  
577 24, 1300-1309.

- 578 Kim SA, Guerinot ML. 2007. Mining iron: Iron uptake and transport in plants. FEBS Letters  
579 581, 2273-2280.
- 580 Kobayashi T, Nishizawa NK. 2012. Iron uptake, translocation, and regulation in higher  
581 plants. Annual Review of Plant Biology. 63, 131-152.
- 582 Kryvoruchko IS, Routray P, Sinharoy S, *et al.* 2018. An iron-activated citrate transporter,  
583 MtMATE67, is required for symbiotic nitrogen fixation. Plant Physiology 176, 2315-2329.
- 584 Kumar RK, Chu HH, Abundis C, Vasques K, Rodriguez DC, Chia JC, Huang R, Vatamaniuk  
585 OK, Walker EL. 2017. Iron-nicotianamine transporters are required for proper long distance  
586 iron signaling. Plant Physiology 175, 1254-1268.
- 587 Kumar S, Stecher G, Tamura K. 2016. MEGA7: Molecular Evolutionary Genetics Analysis  
588 version 7.0 for bigger datasets. Molecular Biology and Evolution 33, 1870-1874.
- 589 Marschner P. 2011. Mineral nutrition of higher plants 3rd Edition. Academic Press.
- 590 Mijovilovich A, Morina F, Bokhari SN, Wolff T, Küpper H (2020) Analysis of trace metal  
591 distribution in plants with lab-based microscopic X-ray fluorescence imaging. *submitted to*  
592 *Plant Methods*
- 593 Morrissey J, Baxter IR, Lee J, Li L, Lahner B, Grotz N, Kaplan J, Salt DE, Guerinot ML  
594 2009. The ferroportin metal efflux proteins function in iron and cobalt homeostasis in  
595 Arabidopsis. Plant Cell 21, 3326-3338.
- 596 Nakagawa T, Kurose T, Hino T, Tanaka K, Kawamukai M, Niwa Y, Toyooka K, Matsuoka  
597 K, Jinbo T, Kimura T. 2007. Development of series of gateway binary vectors, pGWBs, for  
598 realizing efficient construction of fusion genes for plant transformation. Journal of  
599 Bioscience and Bioengineering 104, 34-41.
- 600 Navarro-Rodríguez M, Buesa JM, Rubio LM. 2019. Genetic and biochemical analysis of the  
601 *Azotobacter vinelandii* Molybdenum Storage Protein. Frontiers in Microbiology 10, 579.
- 602 Nelson BK, Cai X, Nebenführ A. 2007. A multi-color set of in vivo organelle markers for  
603 colocalization studies in *Arabidopsis* and other plants. Plant Journal 51, 1126-1136.
- 604 O'Hara GW. 2001. Nutritional constraints on root nodule bacteria affecting symbiotic  
605 nitrogen fixation: a review. Australian Journal of Experimental Agriculture 41, 417-433.

- 606 Rodríguez-Haas B, Finney L, Vogt S, González-Melendi P, Imperial J, González-Guerrero  
607 M. 2013. Iron distribution through the developmental stages of *Medicago truncatula* nodules.  
608 Metallomics 5, 1247-1253.
- 609 Rubio LM, Ludden PW. 2005. Maturation of nitrogenase: a biochemical puzzle. Journal of  
610 Bacteriology 187, 405-414.
- 611 Rubio MC, James EK, Clemente MR, Bucciarelli B, Fedorova M, Vance CP, Becana M.  
612 2004. Localization of superoxide dismutases and hydrogen peroxide in legume root nodules.  
613 Molecular Plant-Microbe Interactions 17, 1294-1305.
- 614 Senovilla M, Castro-Rodríguez R, Abreu I, Escudero V, Kryvoruchko I, Udvardi MK,  
615 Imperial J, González-Guerrero M. 2018. *Medicago truncatula* Copper Transporter1  
616 (MtCOPT1) delivers copper for symbiotic nitrogen fixation. New Phytologist 218, 696-709.
- 617 Tadege M, Wen J, He J, *et al.* 2008. Large-scale insertional mutagenesis using the *Tnt1*  
618 retrotransposon in the model legume *Medicago truncatula*. Plant Journal 54, 335-347.
- 619 Takanashi K, Yokosho K, Saeki K, Sugiyama A, Sato S, Tabata S, Ma JF, Yazaki K. 2013.  
620 LjMATE1: a citrate transporter responsible for iron supply to the nodule infection zone of  
621 *Lotus japonicus*. Plant and Cell Physiology 54, 585-594.
- 622 Tejada-Jiménez M, Castro-Rodríguez R, Kryvoruchko I, Lucas MM, Udvardi M, Imperial J,  
623 González-Guerrero M. 2015. *Medicago truncatula* Natural Resistance-Associated  
624 Macrophage Protein1 is required for iron uptake by rhizobia-infected nodule cells. Plant  
625 Physiology 168, 258-272.
- 626 Tejada-Jiménez M, Gil-Diez P, León-Mediavilla J, Wen J, Mysore KS, Imperial J, González-  
627 Guerrero M. 2017. *Medicago truncatula* molybdate transporter type 1 (MOT1.3) is a plasma  
628 membrane molybdenum transporter required for nitrogenase activity in root nodules under  
629 molybdenum deficiency. New Phytologist 216, 1223-1235.
- 630 Udvardi M, Poole PS. 2013. Transport and metabolism in legume-rhizobia symbioses.  
631 Annual Review of Plant Biology 64, 781-805.
- 632 Vernoud V, Journet EP, Barker DG. 1999. MtENOD20, a Nod factor-inducible molecular  
633 marker for root cortical cell activation. Molecular Plant-Microbe Interactions 12, 604-614.

634 Walker EL, Waters BM. 2011. The role of transition metal homeostasis in plant seed  
635 development. *Current Opinion in Plant Biology* 14, 318-324.

636 Waters BM, Chu HH, DiDonato RJ, Roberts LA, Easley RB, Lahner B, Salt DE, Walker EL.  
637 2006. Mutations in *Arabidopsis Yellow Stripe-Like1* and *Yellow Stripe-Like3* reveal their  
638 roles in metal ion homeostasis and loading of metal ions in seeds. *Plant Physiology* 141,  
639 1446-1458.

640 Wood CC, Petrie JR, Shrestha P, Mansour MP, Nichols PD, Green AG, Singh SP. 2009. A  
641 leaf-based assay using interchangeable design principles to rapidly assemble multistep  
642 recombinant pathways. *Plant Biotechnology Journal* 7, 914-924.

643 Yeoman KH, Wisniewski-Dye F, Timony C, Stevens JB, deLuca NG, Downie JA, Johnston  
644 AW. 2000. Analysis of the *Rhizobium leguminosarum* siderophore-uptake gene *fhuA*:  
645 differential expression in free-living bacteria and nitrogen-fixing bacteroids and distribution  
646 of an *fhuA* pseudogene in different strains. *Microbiology* 146, 829-837.

647 Yordem BK, Conte SS, Ma JF, Yokosho K, Vasques KA, Gopalsam, SN, Walker EL. 2011.  
648 *Brachypodium distachyon* as a new model system for understanding iron homeostasis in  
649 grasses: phylogenetic and expression analysis of Yellow Stripe-Like (YSL) transporters.  
650 *Annals of Botany* 108, 821-833.

651 Yruela I. 2013. Transition metals in plant photosynthesis. *Metallomics* 5; 1090-1109.

652

653

654

655

656

657

658

659

660

661 **Figure Legends**

662 **Fig. 1. *MtYSL3* is highly expressed in nodule and root vasculature.** **A)** Phylogenetic tree  
663 of the Group I YSLs transporters, *MtYSL1-4* (*Medtr1g077840*, *Medtr1g007540*,  
664 *Medtr3g092090* and *Medtr1g007580* respectively) and their representative homologues in  
665 *Zea mays*, *Oryza sativa*, *Brachypodium distachyon* and *Arabidopsis thaliana*. **B)** Gene  
666 expression relative to the internal standard gene *ubiquitin carboxyl-terminal hydrolase* in  
667 shoots, roots and nodules of nitrogen-fertilized plants and nodulated plants. Data are the mean  
668  $\pm$  SE of five independent experiments. **C)** Histochemical staining of GUS activity in 28 dpi  
669 root and nodules of *M. truncatula* plants transformed with containing the *MtYSL3*-  
670 *promoter::gus*. Scale bar = 500  $\mu$ m. **D)** Longitudinal section of a GUS-stained 28 dpi nodule  
671 expressing *gus* under *MtYSL3* promoter. Scale bar = 200  $\mu$ m. **E)** Cross section of a GUS-  
672 stained nodule expressing *gus* under the *MtYSL3* promoter. Scale bar = 200  $\mu$ m. **F)** Cross  
673 section of a GUS-stained root expressing *gus* under the *MtYSL3* promoter. End: endodermis,  
674 Epi: epidermis, VC: vascular cylinder. Scale bar = 50  $\mu$ m.

675

676 **Fig. 2. *MtYSL3*-HA is located in the plasma membrane of endodermal cells in roots and**  
677 **nodules, in root xylem parenchyma and in the nodule cortical cells.** **A)** Longitudinal and  
678 **B)** cross-section of 28 dpi *M. truncatula* nodules colonized with *S. meliloti* constitutively  
679 expressing GFP (green) and transformed with a vector expressing the fusion *MtYSL3*-HA  
680 under the regulation of its endogenous promoter. *MtYSL3*-HA localization was determined  
681 using an Alexa 594-conjugated antibody (red). DNA was stained with DAPI (blue). Left  
682 panels show the overlay of GFP and DAPI channels; centre panels, the Alexa594 channel;  
683 and right panels he overlay of GFP, Alexa594 and DAPI channels with the brightfield image.  
684 Scale bars = 200  $\mu$ m (A) or 50  $\mu$ m (B). **C)** Magnification of the vascular bundle within the  
685 boxed region indicated in (B). Left panels show the overlay of GFP and DAPI channels;  
686 centre panels, the Alexa594 channel; and right panels he overlay of the three channels.  
687 Arrows indicate the position of the autofluorescence signal of the Casparian strip. Scale bars  
688 = 50  $\mu$ m. **D)** Cross section of a *M. truncatula* root transformed with a vector expressing the  
689 fusion *MtYSL3*-HA under regulation of its endogenous promoter located with an Alexa594-  
690 conjugated antibody (red, left panel). Centre panel shows it colocalization with the



691 autofluorescence signal of lignin (green). Right panel shows the overlaid images with the  
692 transillumination channel. Scale bars = 50  $\mu$ m. **E)** Transient expression of MtYSL3-GFP and  
693 AtPIP2-CFP in *N. benthamiana* leaves. Left panel shows the localization of MtYSL3 fused  
694 to GFP (green) in tobacco cells. Middle panel shows the localization of plasma membrane  
695 marker AtPIP2 fused to CFP in the same cells. Right panel is the overlay of the two previous  
696 channels together with the bright field image. Scale bars = 50 $\mu$ m.

697

698 **Fig. 3. *MtYSL3* does not play an important role under non-symbiotic conditions.** **A)**  
699 Position of the *Tnt1* insertion site for *ysl3-1* (NF17945) and for *ysl3-2* (NF12068). **B)** RT-  
700 PCR of *MtYSL3* expression in 28 dpi nodules in wild-type (WT), *ysl3-1* and *ysl3-2* *M.*  
701 *truncatula* lines. Expression of *ubiquitin carboxyl-terminal hydrolase* was used as positive  
702 control. **C)** Growth of representative WT, *ysl3-1* and *ysl3-2* plants. +/+ indicates *ysl3*  
703 segregants with two wild-type copies of *MtYSL3*, while -/- indicate that both copies have the  
704 *Tnt1* insertion. Bar = 3 cm. **D)** Dry weight of shoots and roots of 28 dpi plants. Data are the  
705 mean  $\pm$  SE (n = 20-60 plants). **E)** Chlorophyll content of WT, *ysl3-1* +/+, *ysl3-1* -/-, *ysl3-2*  
706 +/+ and *ysl3-2* -/-. Data are the mean  $\pm$  SE of ten sets of four-five pooled plants. **F)** Iron  
707 content in roots and shoots of WT, *ysl3-1* -/- and *ysl3-2* -/- plants. Data are the mean  $\pm$  SE of  
708 three pools of four-five plants. **G)** Copper content in roots and shoots of WT, *ysl3-1* -/- and  
709 *ysl3-2* -/- plants. Data are the mean  $\pm$  SE of three pools of four-five plants. **H)** Zinc content  
710 in roots and shoots of WT, *ysl3-1* -/- and *ysl3-2* -/- plants. Data are the mean  $\pm$  SE of three  
711 pools of four-five plants.

712

713 **Fig. 4. *MtYSL3* participates in symbiotic nitrogen fixation.** **A)** Representative WT, *ysl3-1*  
714 and *ysl3-2* plants. +/+ indicates *ysl3* segregants with two wild-type copies of *MtYSL3*, while  
715 -/- indicate that both copies have the *Tnt1* insertion. Bar = 3 cm. **B)** Dry weight of shoots and  
716 roots of 28 dpi plants. Data are the mean  $\pm$  SE (n = 10-40 plants). **C)** Number of nodules per  
717 plant in WT and mutant lines. Data are the  $\pm$  SE (n = 10-40 plants). **D)** Nitrogenase activity  
718 in 28 dpi nodules from WT, *ysl3-1*, and *ysl3-2* plants. Data are the mean  $\pm$  SE (n = 5-15 sets  
719 of pooled plants). **E)** Iron content in shoots, roots and nodules of WT, *ysl3-1* -/- and *ysl3-2* -

720   /- plants. Data are the mean  $\pm$  SE of three pools of four-five plants. **F)** Copper content in  
721   shoots, roots and nodules of WT, *ysl3-1* -/- and *ysl3-2* -/- plants. Data are the mean  $\pm$  SE of  
722   three pools of four-five plants. **G)** Zinc content in roots and shoots of WT, *ysl3-1* -/- and *ysl3-*  
723   2 -/- plants. Data are the mean  $\pm$  SE of three pools of four-five plants.

724

725   **Fig. 5. Mutation of *MtYSL3* alters nodule iron and zinc distribution.** A) X-ray  
726   fluorescence localization of calcium (top panels), iron (centre panels) and zinc (lower panels)  
727   in representative 28 dpi nodules from WT and *ysl3-1* -/- plants. **B)** Ratio of iron concentration  
728   in the apical *vs* the fixation zone in 28 dpi nodules from WT and *ysl3-1* -/- plants. Data are  
729   the mean  $\pm$  SE (n = 4-5 nodules). **C)** Ratio of zinc concentration in the nodule core *vs* the  
730   vasculature in 28 dpi nodules from WT and *ysl3-1* -/- plants. Data are the mean  $\pm$  SE (n = 4-  
731   5 nodules).

## FIGURE 1

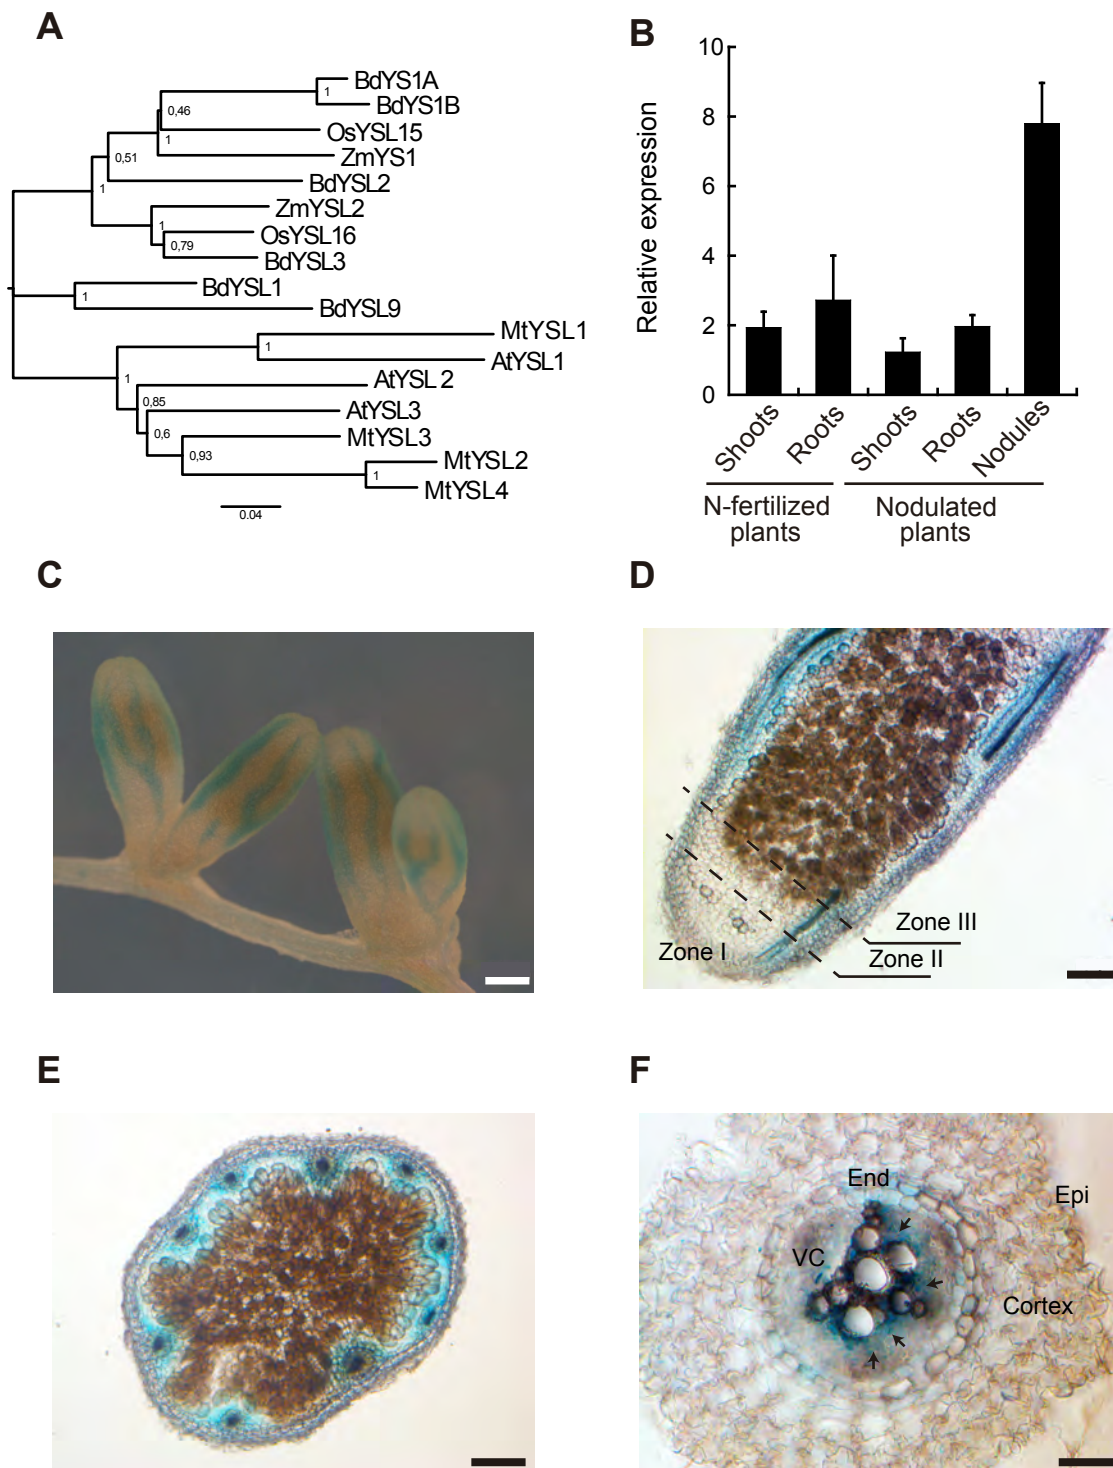

## FIGURE 2

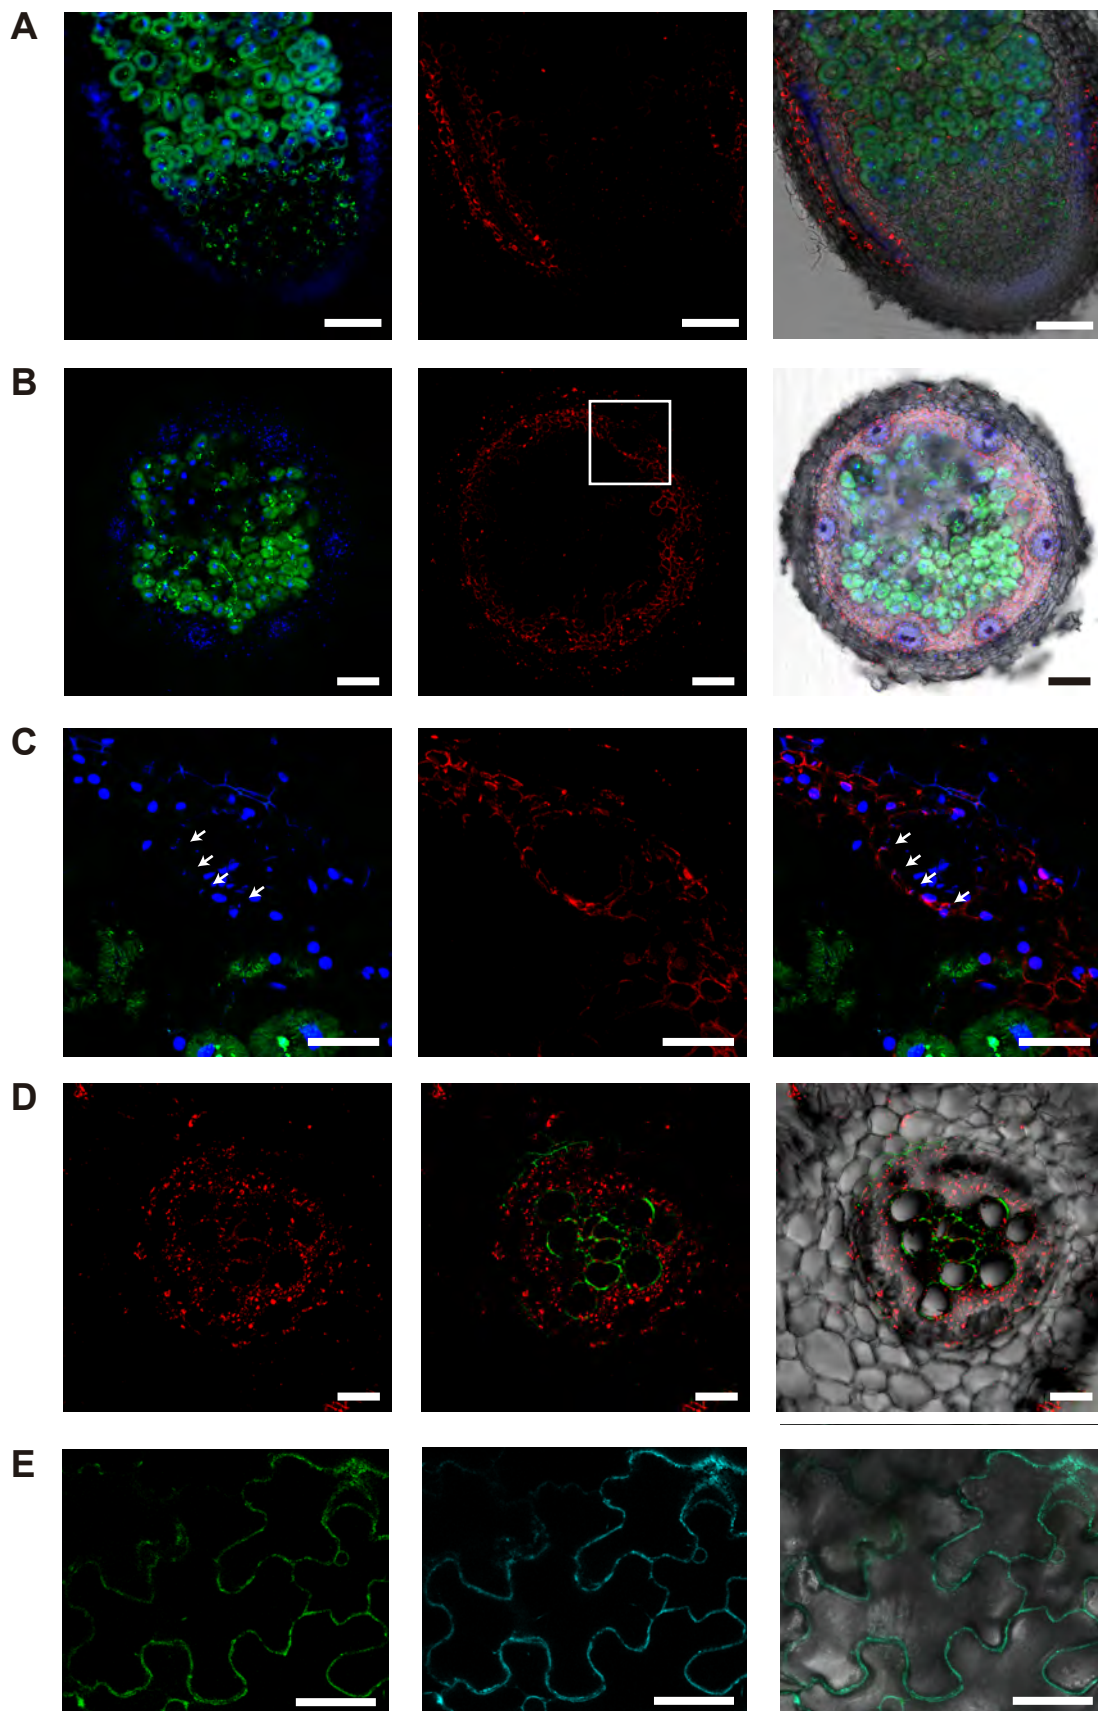

## FIGURE 3

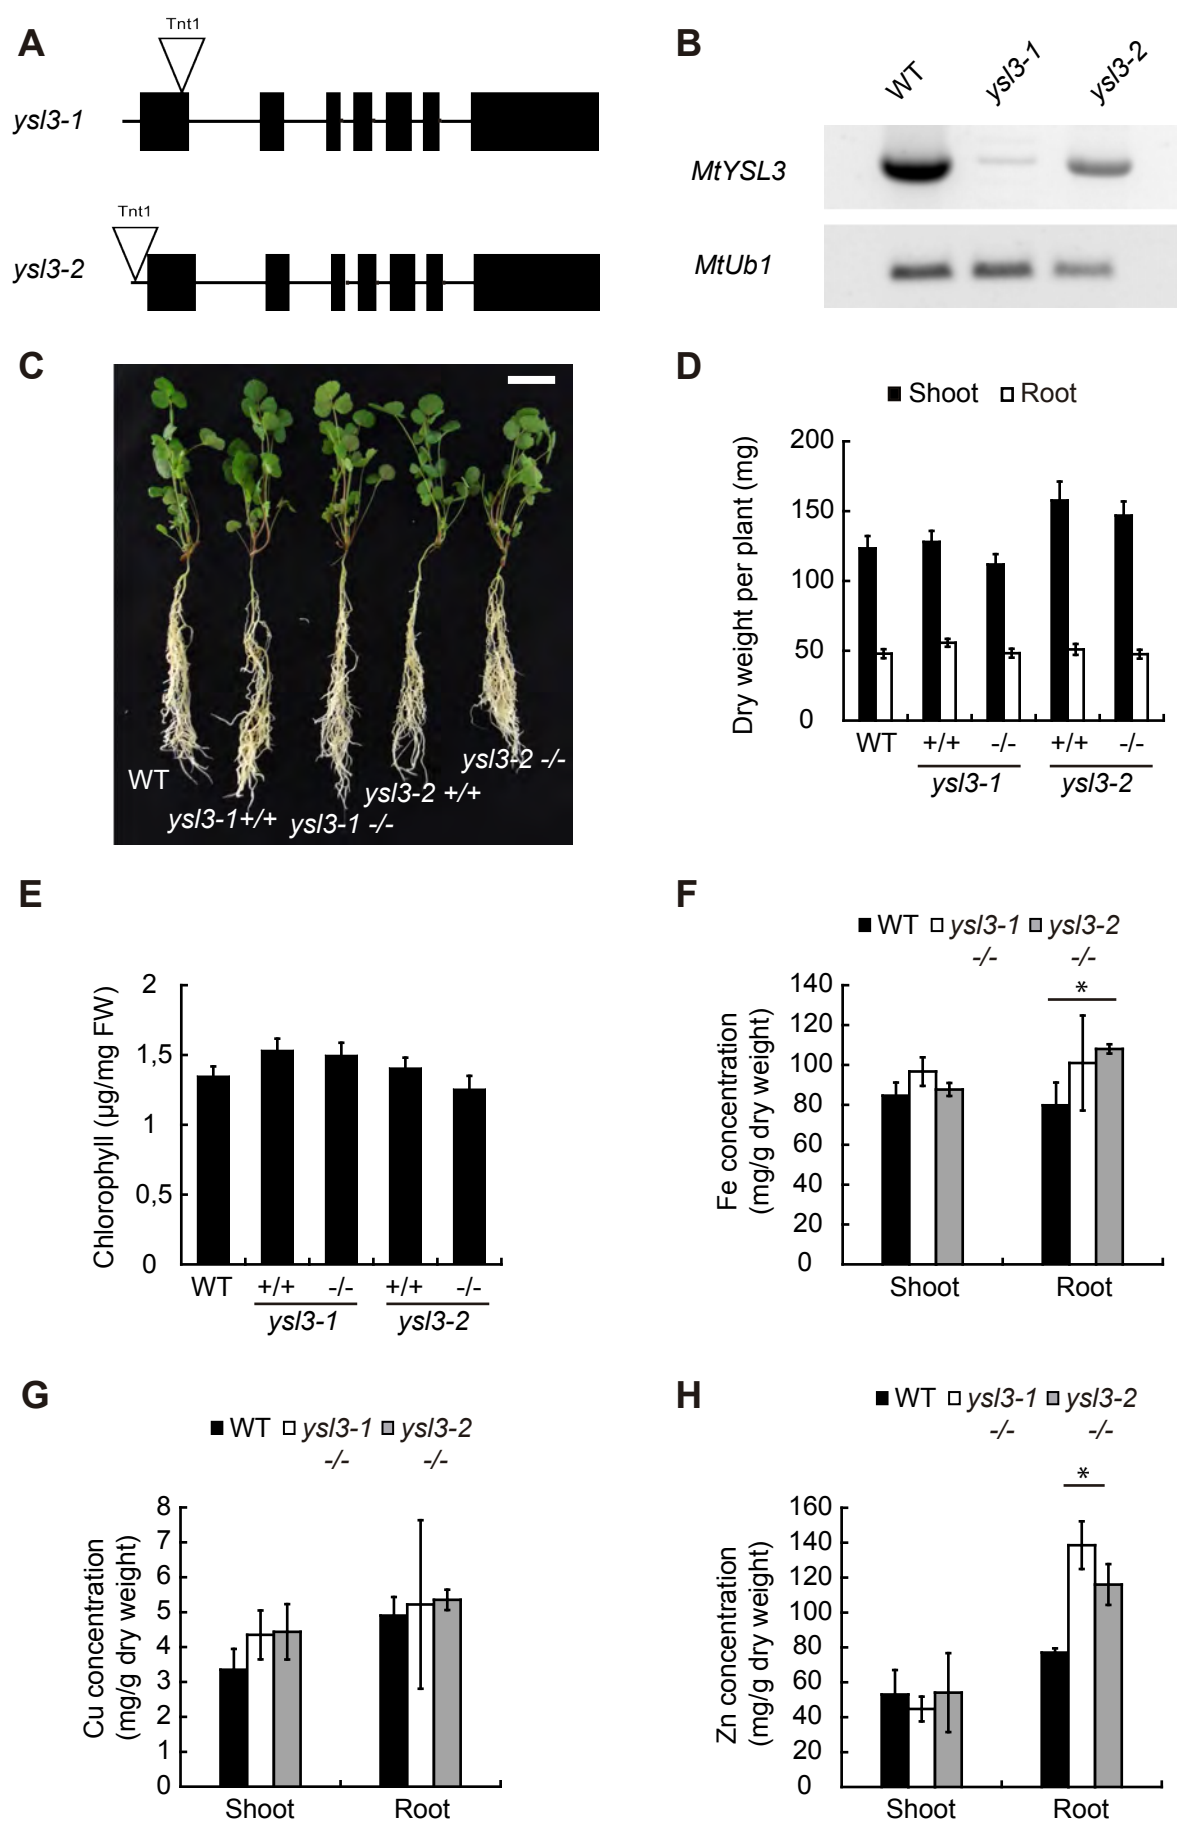

## FIGURE 4

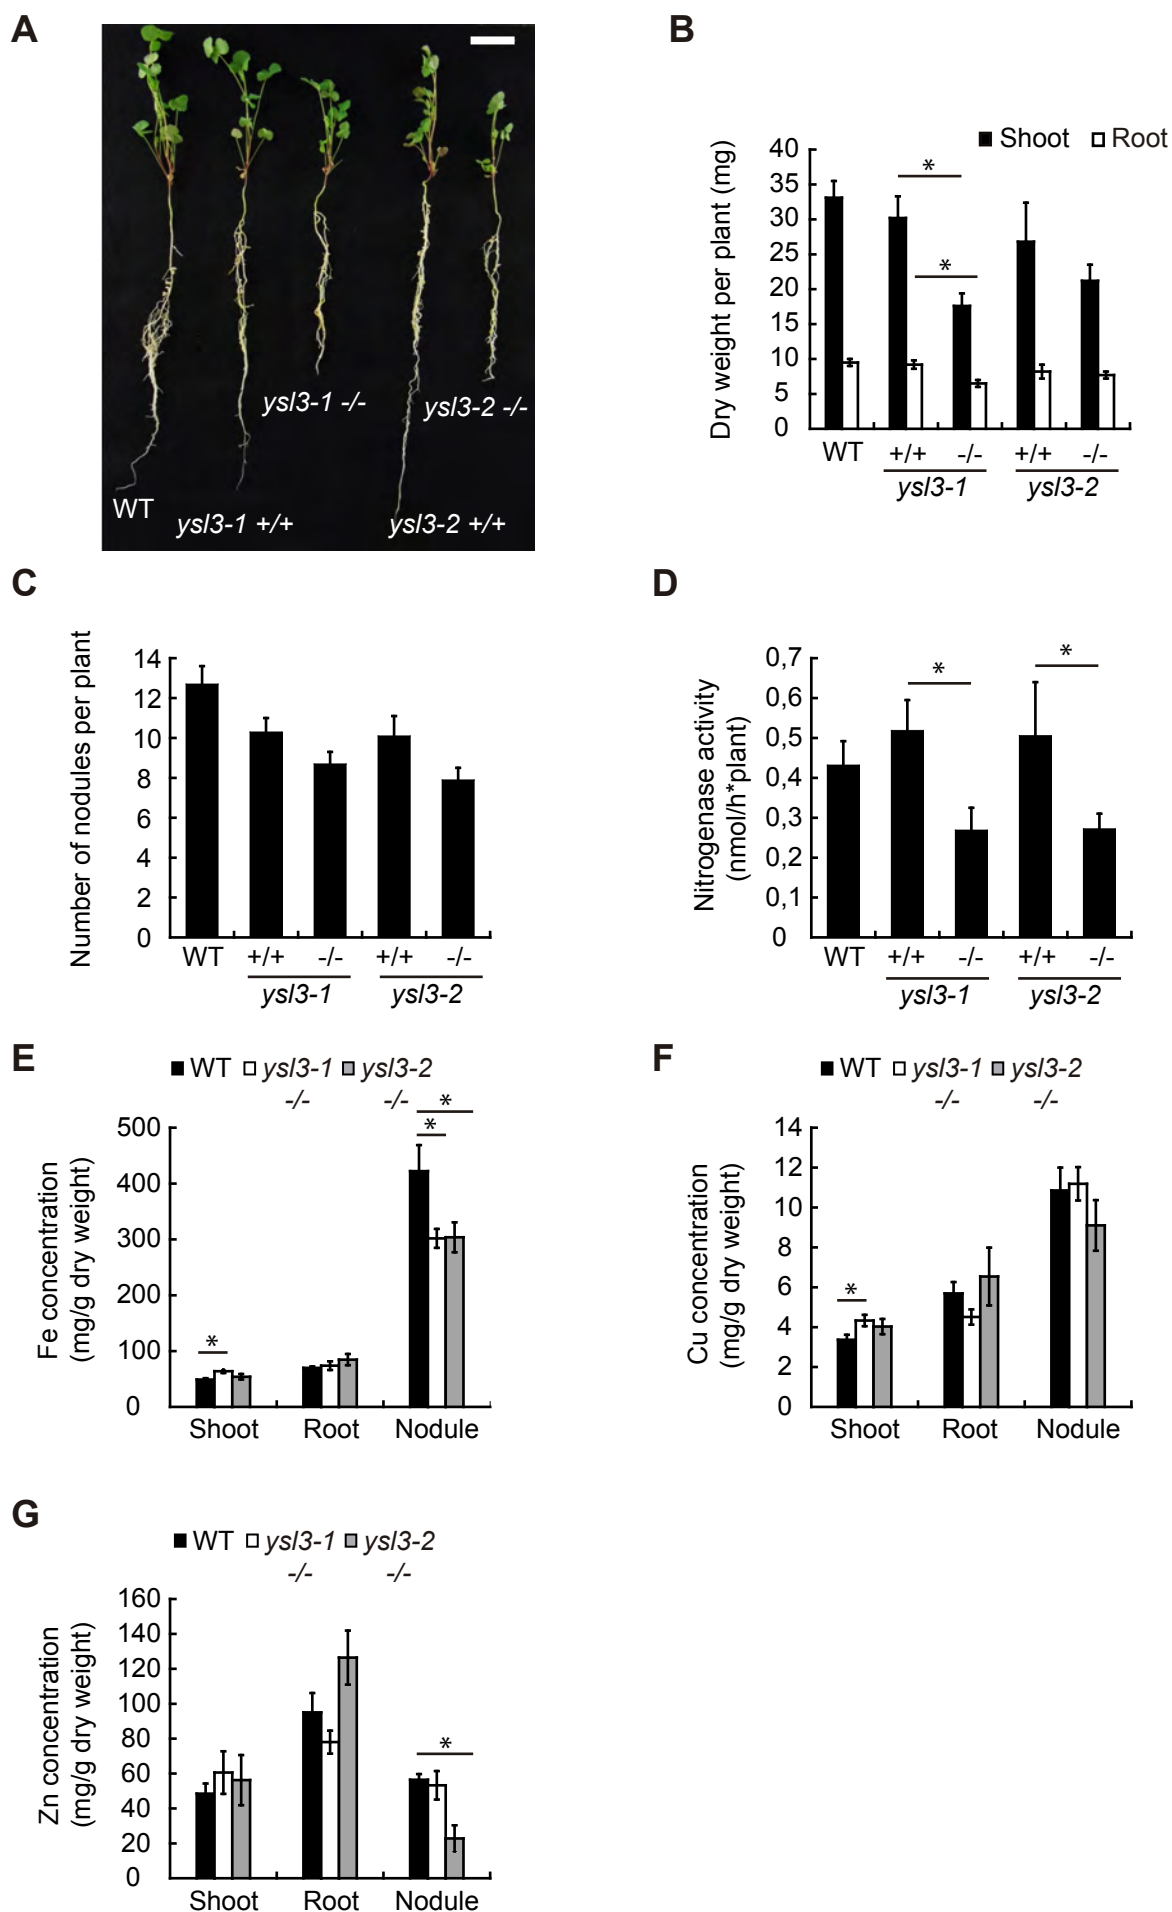

## FIGURE 5

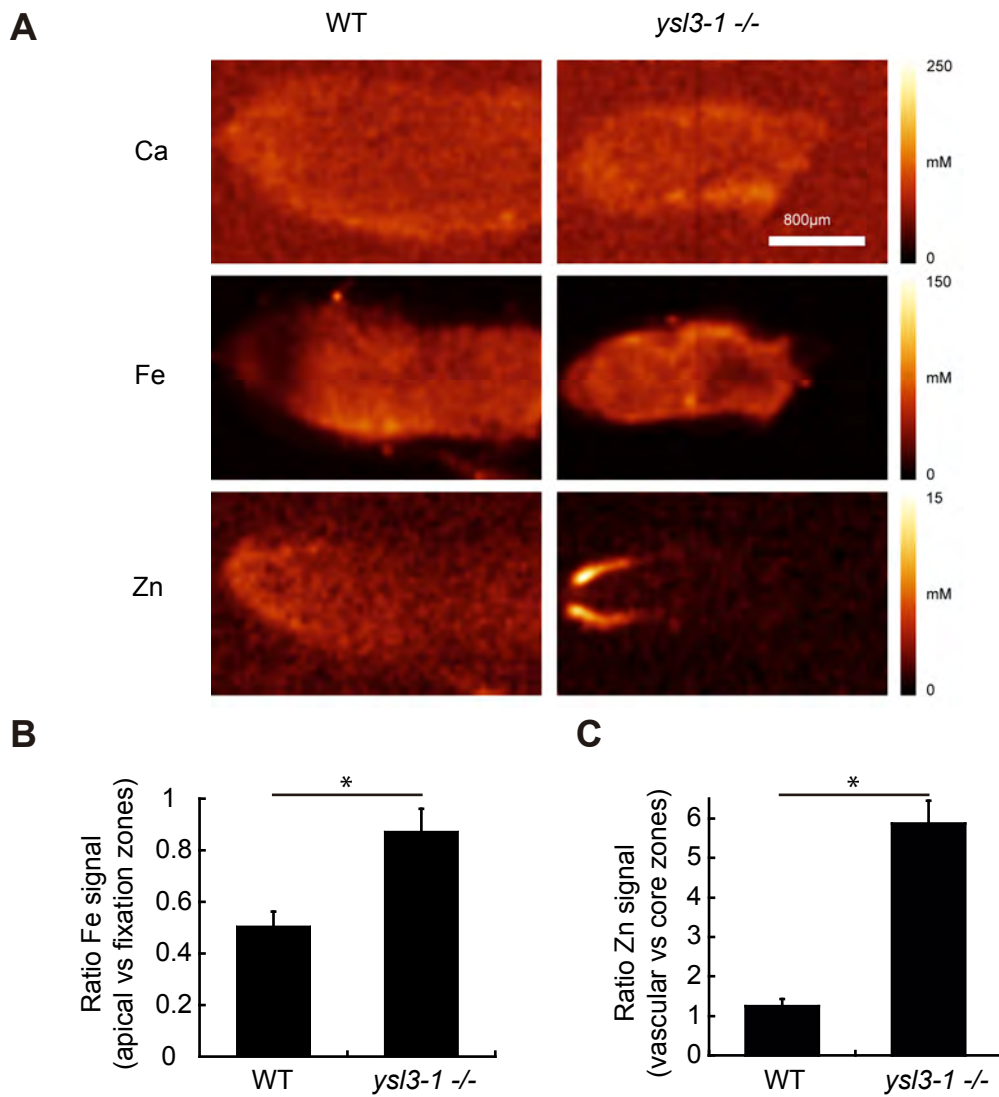

Source: https://www.biorxiv.org/content/10.1101/2019.12.23.887448v1.full.pdf
